# Supplementary material for: Functional and evolutionary perspectives on gill structures of an obligate air-breathing, aquatic snail
Source: PeerJ journal article supplement (doi:10.7717/peerj.7342), 2019-07-31

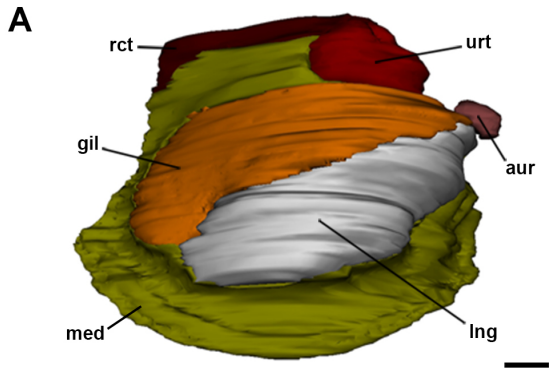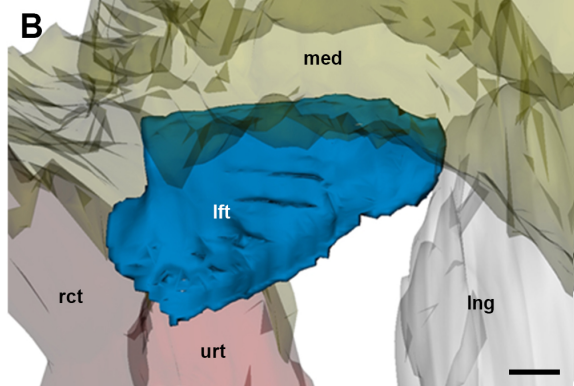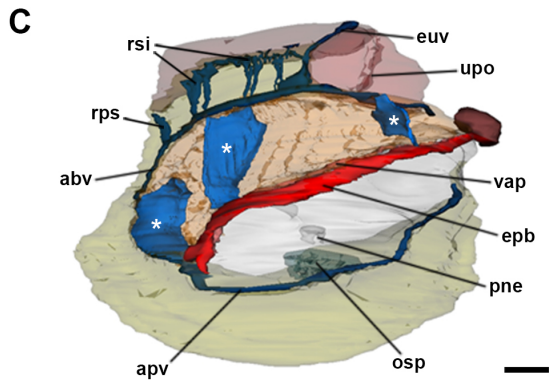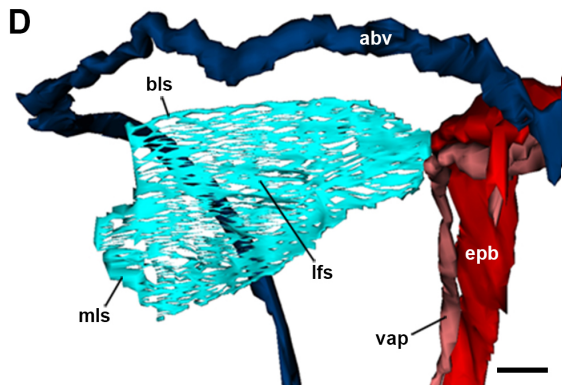

Supplement: Supplemental_Figure_S2.pdf [file Supplemental_Figure_S2.pdf]
